# Supplementary material
Source: MDPI journal article supplement (https://www.mdpi.com/2075-163X/9/9/544)
Supplement: s1 [file s1]

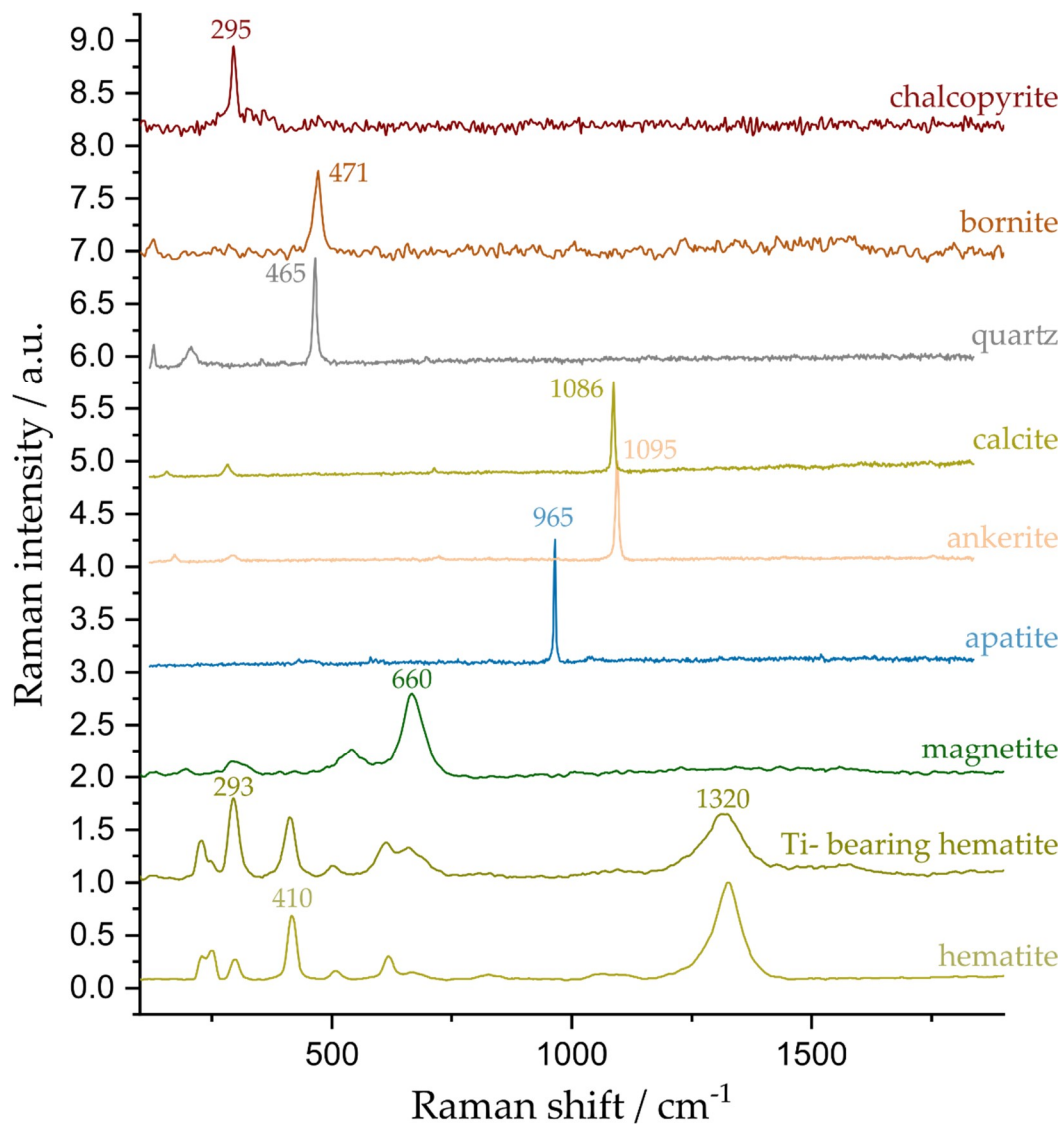

**Figure S1.** Reference Raman spectra. Background-corrected and normalized Raman reference spectra used for linear combination.
